# Supplementary material
Source: HighWire-hosted journal article supplement (https://bmjopen.bmj.com/content/7/2/e012940)
Supplement: inline-supplementary-material-1 [file inline-supplementary-material-1.pdf]

Supplementary Table 1 In-hospital and long-term mortalities in patients with type A AAD onset in different seasons (months)

|                                   | Winter |      |      | Spring |      |      | Summer |      |      | Autumn |      |      | P value |
|-----------------------------------|--------|------|------|--------|------|------|--------|------|------|--------|------|------|---------|
|                                   | N=129  |      |      | N=147  |      |      | N=92   |      |      | N=124  |      |      |         |
|                                   | Dec    | Jan  | Feb  | Mar    | Apr  | May  | Jun    | Jul  | Aug  | Sep    | Oct  | Nov  |         |
|                                   | N=46   | N=35 | N=48 | N=48   | N=53 | N=46 | N=32   | N=19 | N=41 | N=33   | N=39 | N=52 |         |
| In-hospital mortality (month, %)  | 10.9   | 2.9  | 16.7 | 2.1    | 7.5  | 8.7  | 9.4    | 10.5 | 7.3  | 12.1   | 30.8 | 25.0 | <0.01   |
| In-hospital mortality (season, %) |        | 10.9 |      |        | 6.1  |      |        | 8.7  |      |        | 23.4 |      | <0.01   |
| Long-term mortality (month, %)    | 4.9    | 5.9  | 2.5  | 6.4    | 4.1  | 11.9 | 10.3   | 5.9  | 5.3  | 3.4    | 3.7  | 5.1  | 0.89    |
| Long-term mortality (season, %)   |        | 4.3  |      |        | 7.2  |      |        | 7.1  |      |        | 4.2  |      | 0.63    |

AAD= acute aortic dissection
